# Supplementary material for: Two-fold symmetric superconductivity in the Kagome superconductor RbV3Sb5
Source: Springer Nature journal article supplement (doi:10.1038/s42005-023-01496-3), 2024-01-05
Supplement: 42005_2023_1496_MOESM1_ESM.pdf [file 42005_2023_1496_MOESM1_ESM.pdf]

Supplementary Materials for

**Two-fold symmetric superconductivity in the thin-film  
kagome superconductor  $\text{RbV}_3\text{Sb}_5$**

\*Corresponding author. Email: linbc@sustech.edu.cn

**This PDF file includes:**

Fig. S1 The temperature dependence of the resistance of a typical  $\text{RbV}_3\text{Sb}_5$  device (S3).

Fig. S2 Differential resistance versus bias current and out-of-plane magnetic fields.

Fig. S3 The out-of-plane angle dependence of the critical magnetic field.

Fig. S4 Another sample S2 showing a similar two-fold symmetric behavior.

Fig. S5 The two-fold superconducting behavior with the current along  $\theta = 90^\circ$ .

Fig. S6 The in-plane angle dependence of the magneto-resistance of device S1&S2 at a high temperature of 20 K.

Fig. S7 The in-plane angle dependence of the magnetoresistance of device S1 at a high magnetic field of 7.5 T.

Fig. S8 The electron backscatter diffraction (EBSD) pattern of a typical  $\text{RbV}_3\text{Sb}_5$  single crystal.

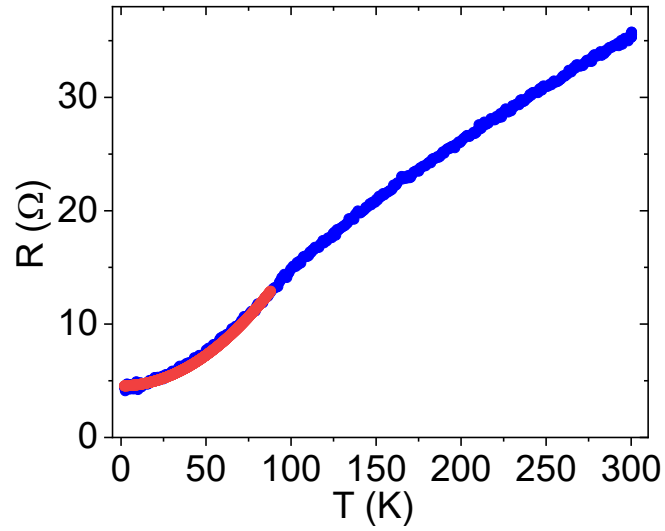

**Fig. S1 The temperature dependence of the resistance of a typical  $\text{RbV}_3\text{Sb}_5$  device (S3).** At low temperatures, the resistance can be fitted (red line) according to the Fermi liquid model  $R=R_0+AT^2$ , where  $T$  is the temperature,  $R_0$  and  $A$  are constants, indicating the electron-electron scattering dominates over the electron-phonon scattering. The hump is around 100 K, which is consistent with the critical temperature of the CDW transition.

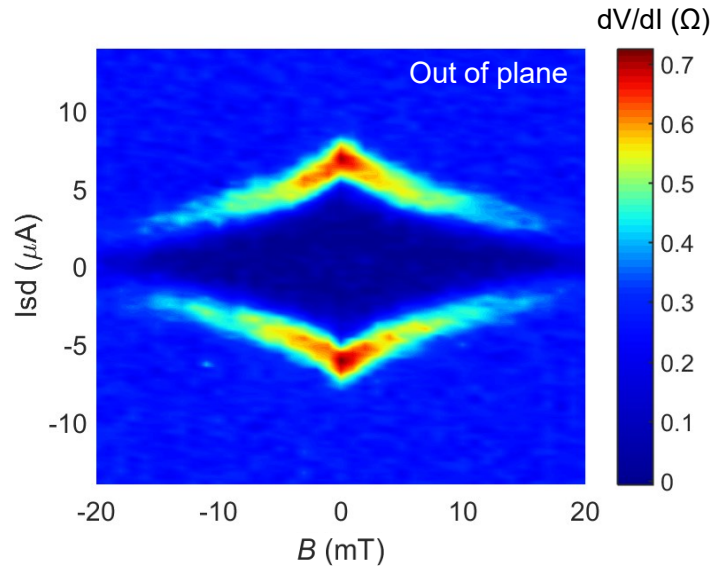

**Fig. S2 Differential resistance versus bias current and out-of-plane magnetic fields.** The out-of-plane anisotropic superconducting behavior is common in thin-film superconductors.

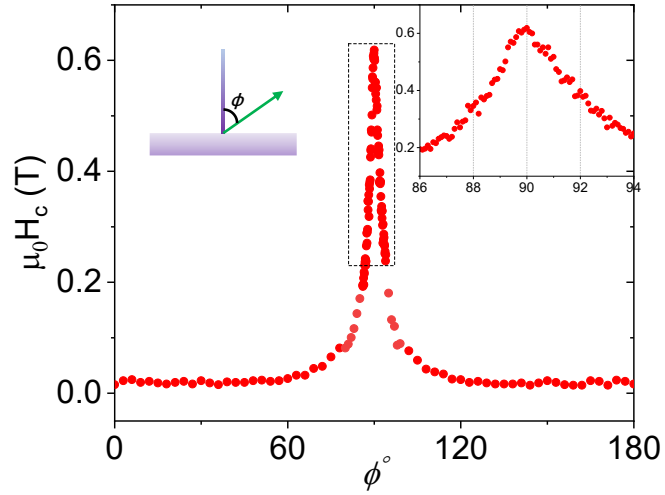

**Fig. S3 The out-of-plane angle dependence of the critical magnetic field.** Here the angle  $\phi$  denotes the deviation from the normal direction perpendicular to the sample plane as shown in the inset. The green arrow represents the magnetic field direction. The critical magnetic field peaks at  $90^\circ$ , namely the in-plane direction. Such measurements rule out the possible out-of-plane contribution with an accuracy of  $\sim 0.1^\circ$ .

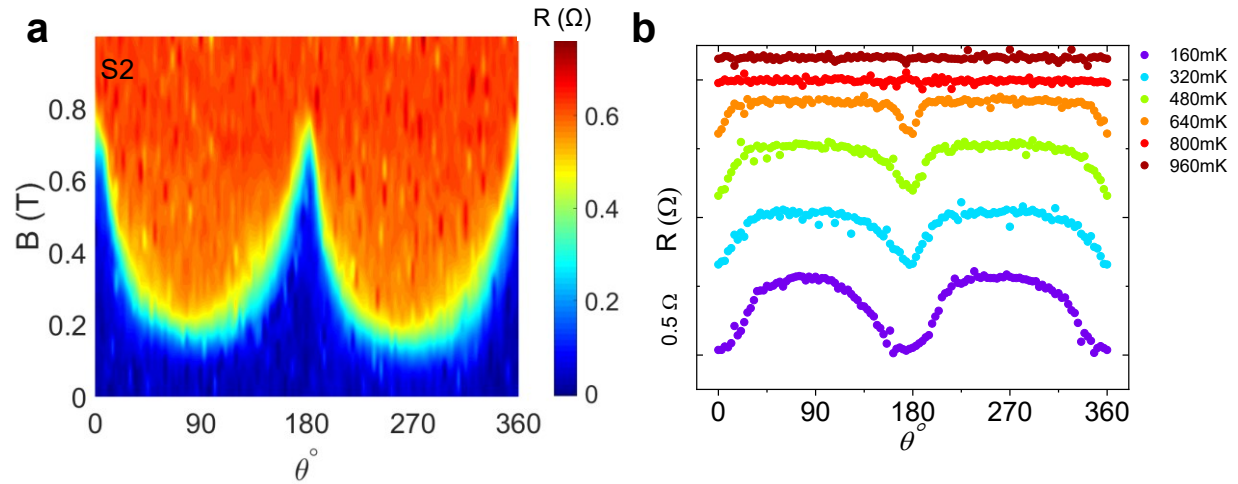

**Fig. S4 Another sample S2 showing a similar two-fold symmetric behavior.** **a** The in-plane angle dependence of the magneto-resistance was measured. The two-fold anisotropy is only observed when the sample is in the superconducting state. **b** The temperature dependence of the two-fold symmetric magneto-resistance at 300 mT. When the sample is in the normal state at high temperatures, the two-fold symmetry disappears. The curves were shifted for clarity.

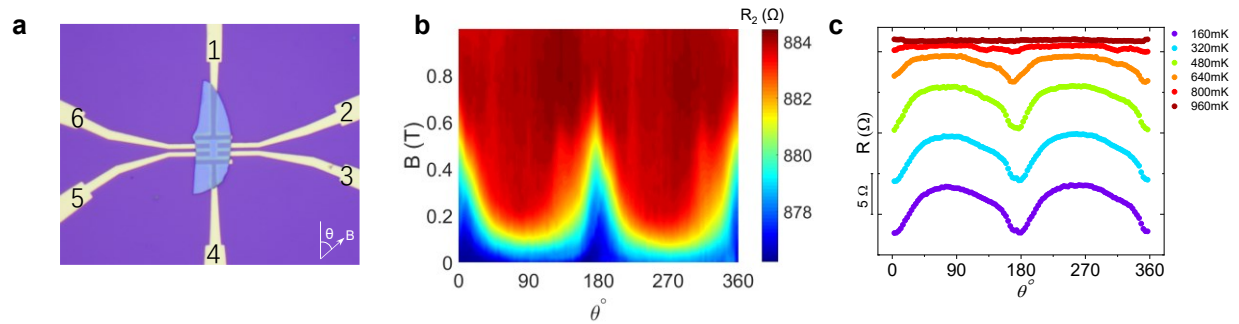

**Fig. S5 The two-fold superconducting behavior with the current along  $\theta = 90^\circ$ .** **a** The optical image of device S1 with the number labeling the measurement terminals. **b** The current was applied along terminals 3,5 (perpendicular to the current direction in the main text) and the voltage was simultaneously measured, then we get the two-terminal resistance  $R_2$ . The two-fold symmetry of the superconducting behavior was also observed, indicating such two-fold symmetry is independent of the current direction. **c** The temperature dependence of the two-fold modulation of the magnetoresistance at 200 mT. The curves were shifted for clarity.

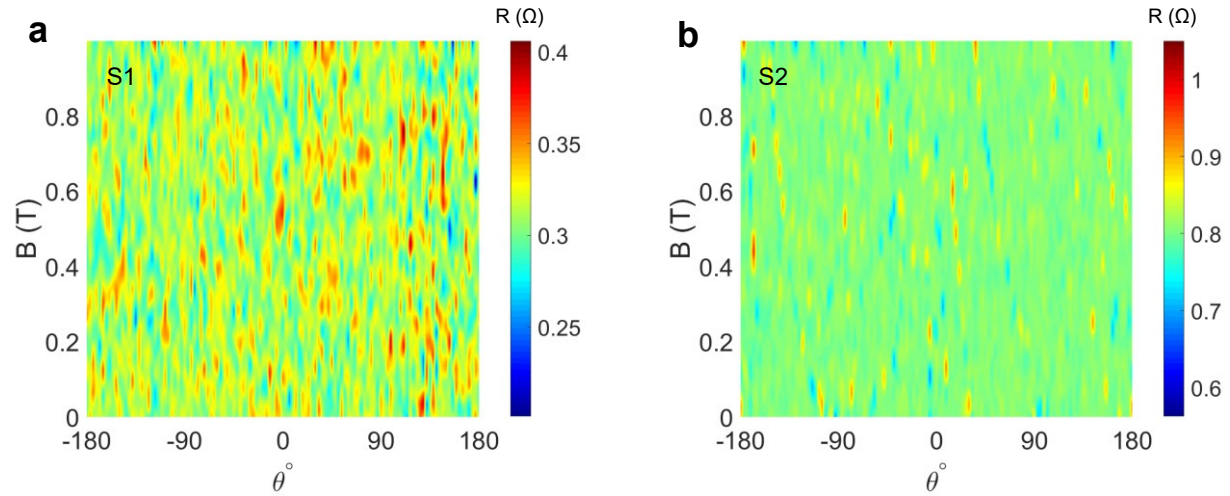

**Fig. S6** The in-plane angle dependence of the magneto-resistance of device S1&S2 at a high temperature of 20 K, far above the critical superconducting temperature. No evident symmetric behavior in any form was observed.

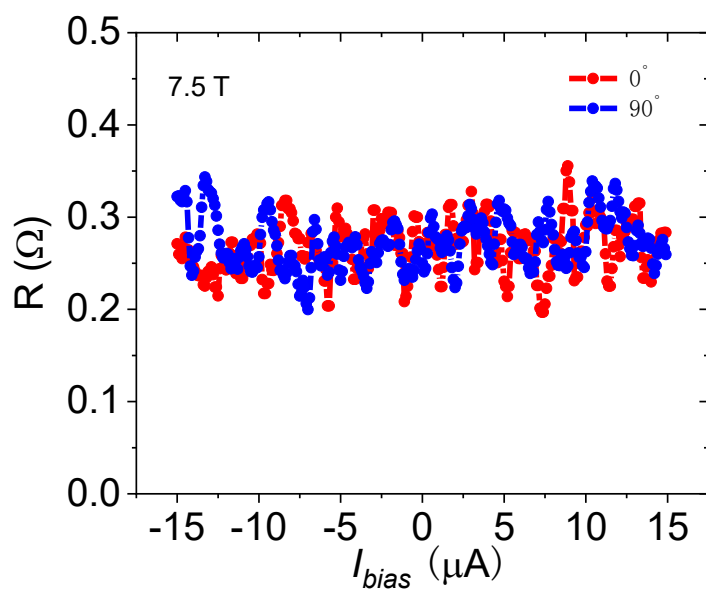

**Fig. S7** The in-plane angle dependence of the magnetoresistance of device S1 at a high magnetic field of 7.5 T, far above the critical magnetic field. No evident anisotropy was observed.



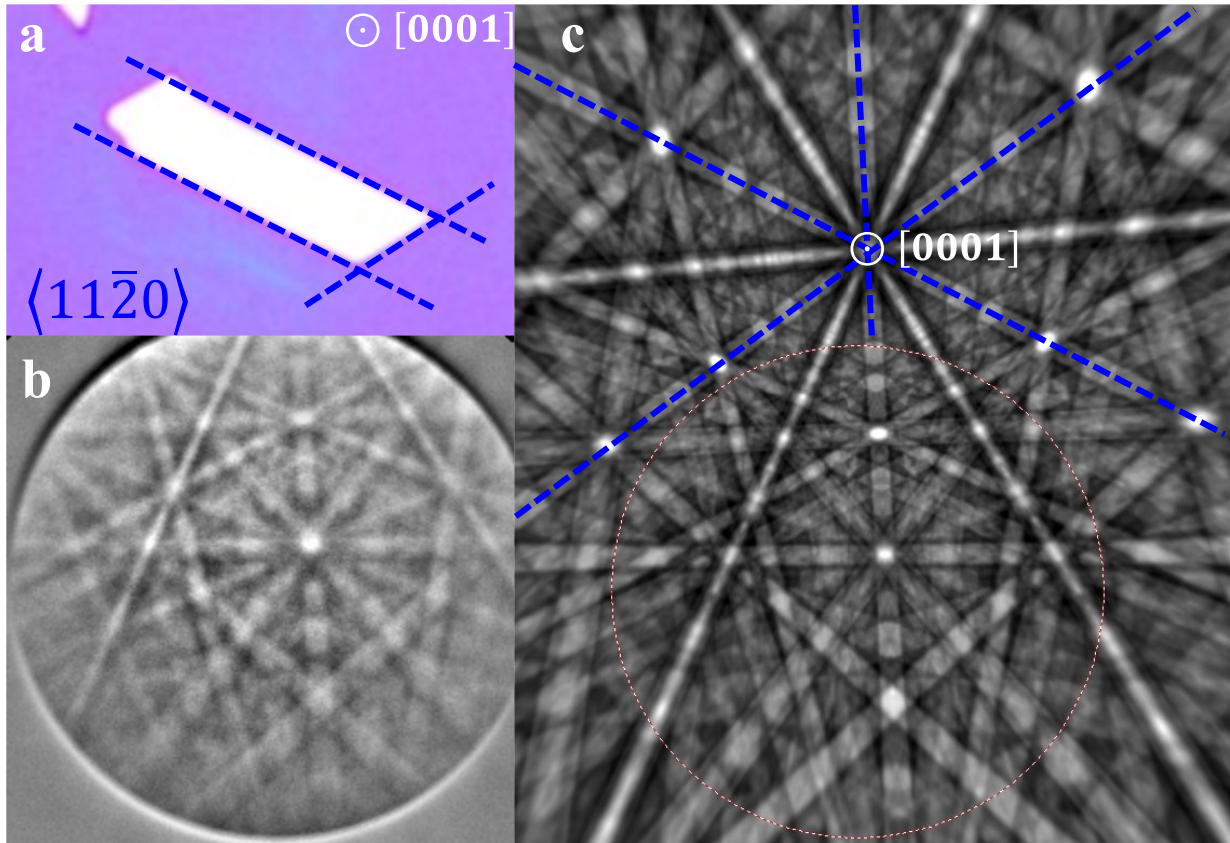

**Fig. S8 The electron backscatter diffraction (EBSD) pattern of a typical  $\text{RbV}_3\text{Sb}_5$  single crystal.** **a** The optical image of a typical cleaved sample. **b** The experimental EBSD pattern. **c** The simulated pattern. The simulated pattern in **c** matches the experimental pattern in **b** very well. The blue bands are a family of  $\{1\bar{1}00\}$  crystal planes with six-fold rotational symmetry, of which the orientation matches the edges of the  $\text{RbV}_3\text{Sb}_5$  flakes shown in **a**. The lateral surfaces of the exfoliated  $\text{RbV}_3\text{Sb}_5$  single crystal are therefore the family of  $\{1\bar{1}00\}$  crystal planes. The crack propagation direction is  $\langle 11\bar{2}0 \rangle$ .
